# Supplementary material for: Single gene reassortment of highly pathogenic avian influenza A H5N1 in the low pathogenic H9N2 backbone and its impact on pathogenicity and infectivity of novel reassortant viruses
Source: Springer Nature journal article supplement (doi:10.1007/s00705-017-3434-x), 2017-06-15
Supplement: MOESM2 [file 12447788]

#
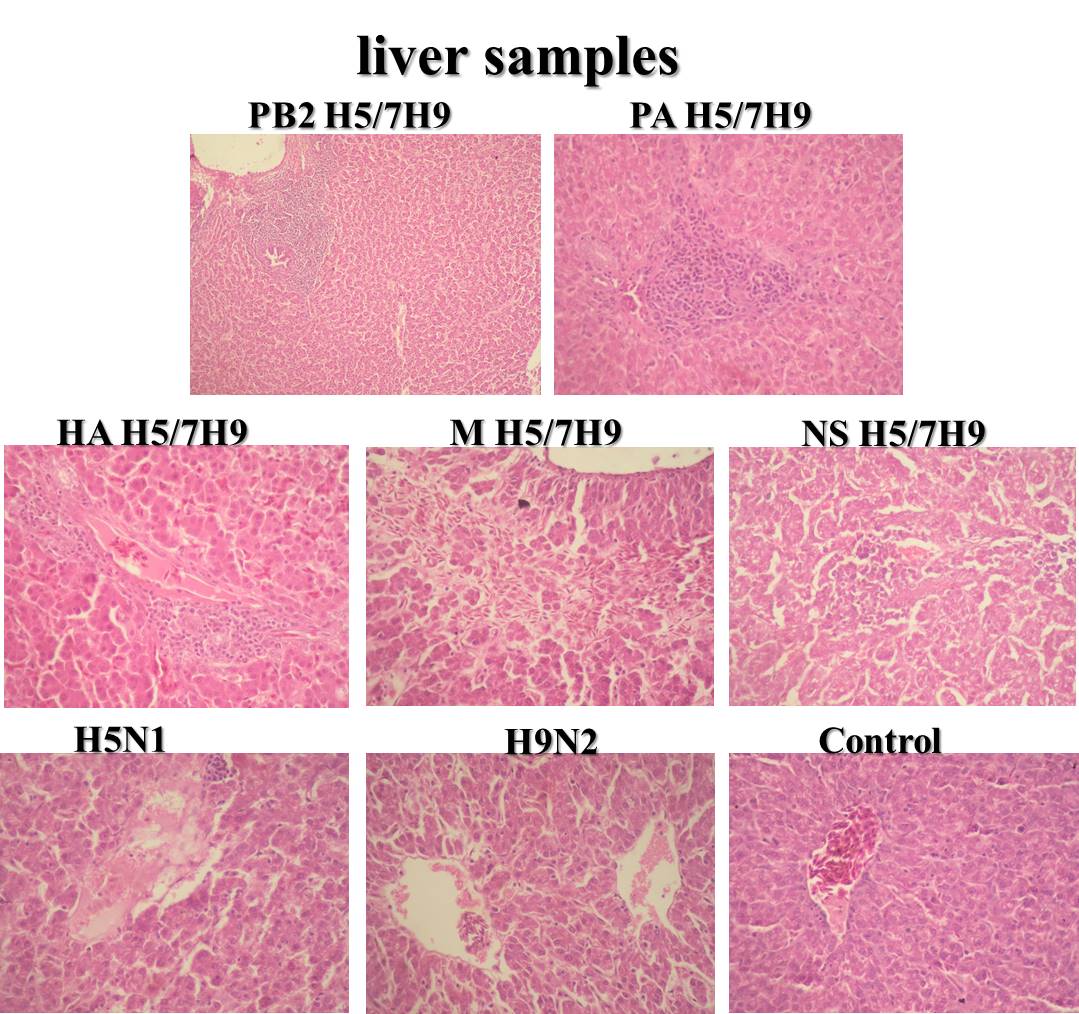

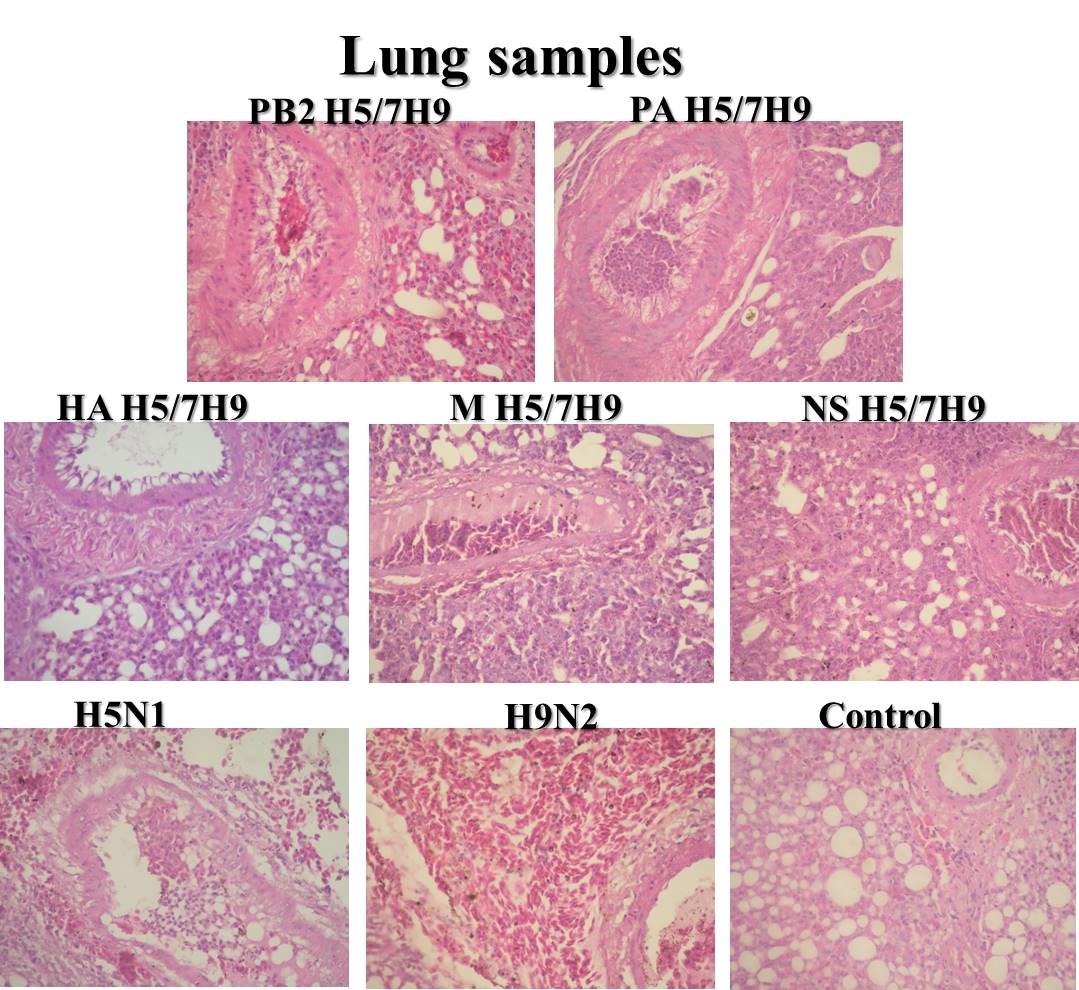

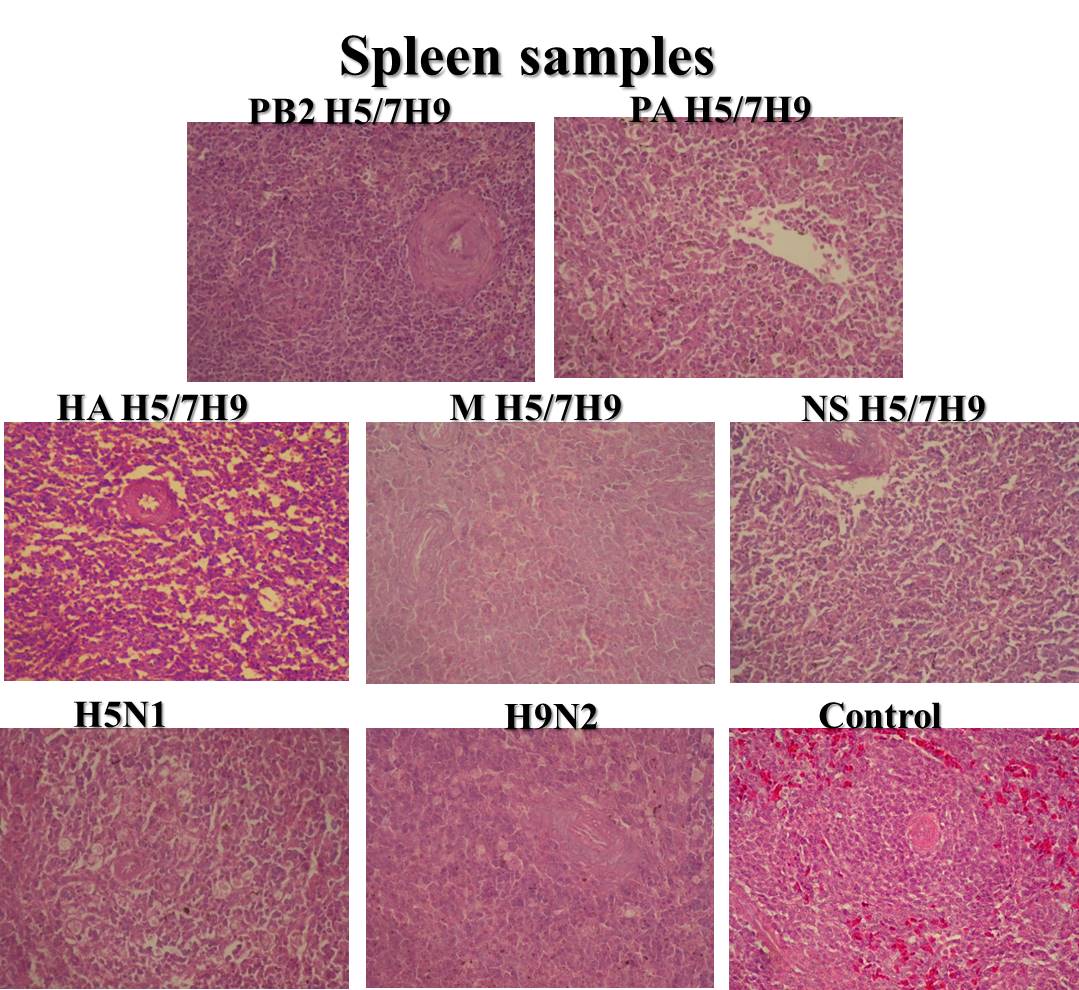

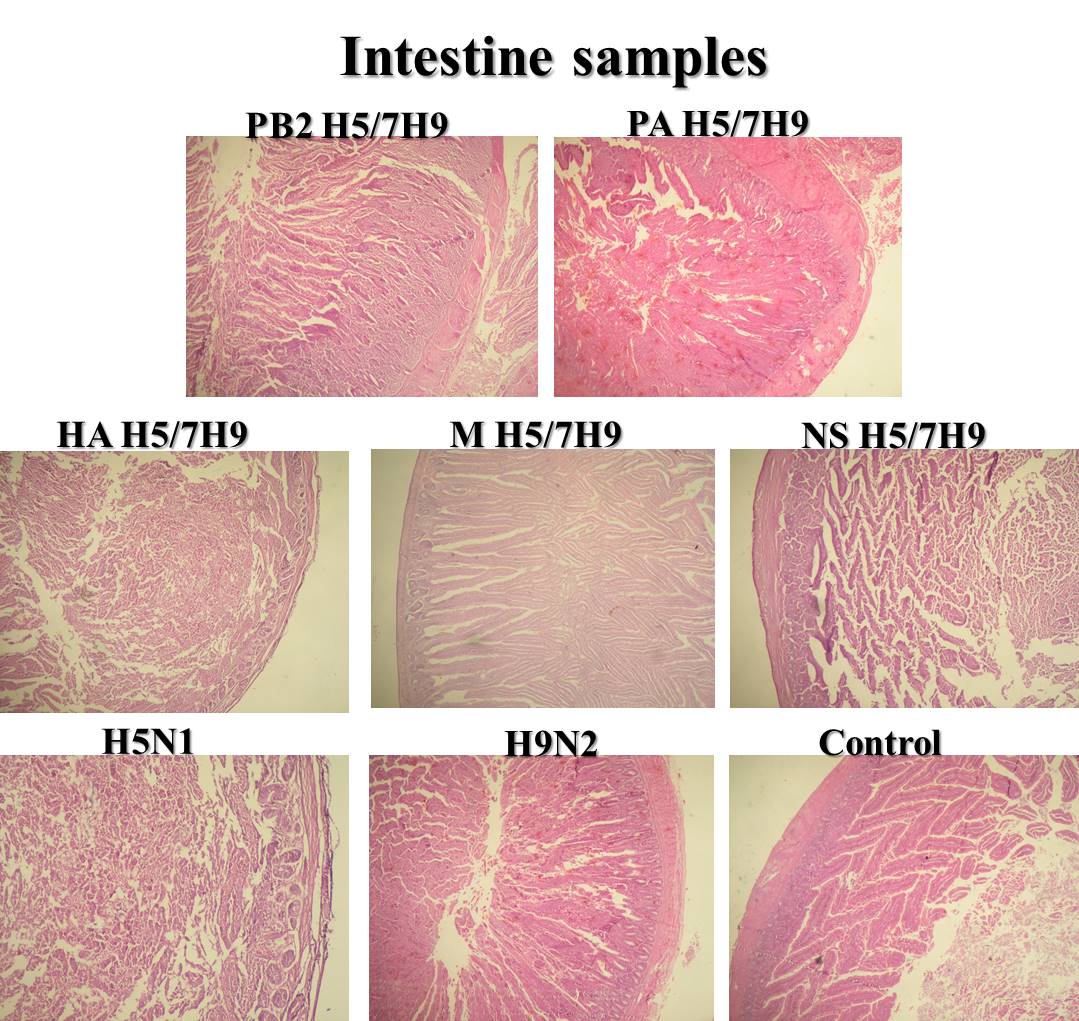


**Plate1:** Photomicrograph of liver section from different experimental groups showing (A) Lymphocytic cell reaction in the portal area (star) with endothelial cell degeneration at the blood vessel wall (arrow). (B) Focal area of necrosis infiltrated with monocytic cellular reaction (star) . (C) Degeneration in the endothelial cell linning blood vessels with thrombus formation (arrow) and perivascular lymphoid cell reaction (star) . (D) Focal area of necrosis and haemorrhage (star) with endothelial cell degeneration at the blood vessel wall (arrow). (E) Minute foci of necrosis infiltrated with mononuclear cells and edema in the Disse spaces (star). (F) Focal hepatocellular necrosis without inflammatory cell infiltration (star) along with edema in the Disse spaces.(G) Severe congestion of the vasculature (star) with edema in the Disse spaces and degeneration in the endothelial cell linning blood vessels (arrow).(H) Normal histological structure of the liver tissue. H&E X40.

**Supplementary Fig. S2**

D

C

G

H

F

E

B

A

**Plate 2:** Photomicrograph of lung section from different experimental groups showing (A) Congestion of the vasculature (star) with nuclear and cytoplasmic endothelial cell swelling (arrow). (B) Interstitial pneumonia (star) with nuclear and cytoplasmic swelling of the endothelial cell linning blood vessels (arrow) which engorged with leucocytes .(C) Marked cytoplasmic swelling of the endothelial cell linning blood vessels with pyknosis of their nuclei (arrow). (D&E) Interstitial pneumonia (star) with marked endothelial cell degeneration and thrombosis in the blood vessels (arrows). (F) Marked degeneration and necrosis of the blood vessel wall (arrow) with perivascular haemorrhage (star) .(G) Severe perivascular haemorrhage (star) with degeneration in the vessel wall associated with thrombus formation (arrow). (H) Normal morphological structure of the lung tissue. H&E. X40.

D

E

H

G

F

C

B

A

**Plate 3:** Photomicrograph of spleen section from different experimental groups showing (A) Reactive proliferation of the lymphocytes in the splenic follicles (star). (B) Scattered pyknotic lymphocytes with focal necrosis and fibrinous exudation specially at the perivascular lymphocyte sheaths (star). (C) Marked lymphocytic cell depletion at the white bulb (star). (D) Reactive lymphocytic cell proliferation in the splenic follicles (star). (E) Necrosis in the lymphocytes at the perivascular sheath (star). (F) Lymphocytic cell necrosis with fibrinous exudation involve the whole splenic follicles (star). (G) Mild necrosis of some lymphocytes associated with reactive lymphoid cell proliferation at the periphery of the follicle (star). (H) Normal histological structure of the white and red pulp of the spleen. H&E. X40.

E

D

H

A

B

C

G

F

E

B

A

C

D

F

G

H

**Plate 4**: Photomicrograph of intestinal section from different experimental groups showing (A) Necrobiosis at the tips of the intestinal villi (star). (B) Necrosis associated with haemorrhage at the intestinal mucosa and lamina propria (star). (C) Severe necrosis include the intestinal mucosa lamina propria and submucosa (star). (D) The intestinal mucosa are more or less normal. (E) The necrosis involve the intestinal mucosa (star). (F) Severe necrosis involve the intestinal mucosa and lamina propria (star). (G) Necrosis at the tips of intestinal villi (star). (H) Normal histological structure of the intestinal wall. H&E X10

D

D

D
